# Supplementary material for: Reciprocal regulation between nicotinamide adenine dinucleotide metabolism and abscisic acid and stress response pathways in Arabidopsis
Source: PubMed Central journal article supplement (PMC7332101; doi:10.1371/journal.pgen.1008892), 2020-06-22

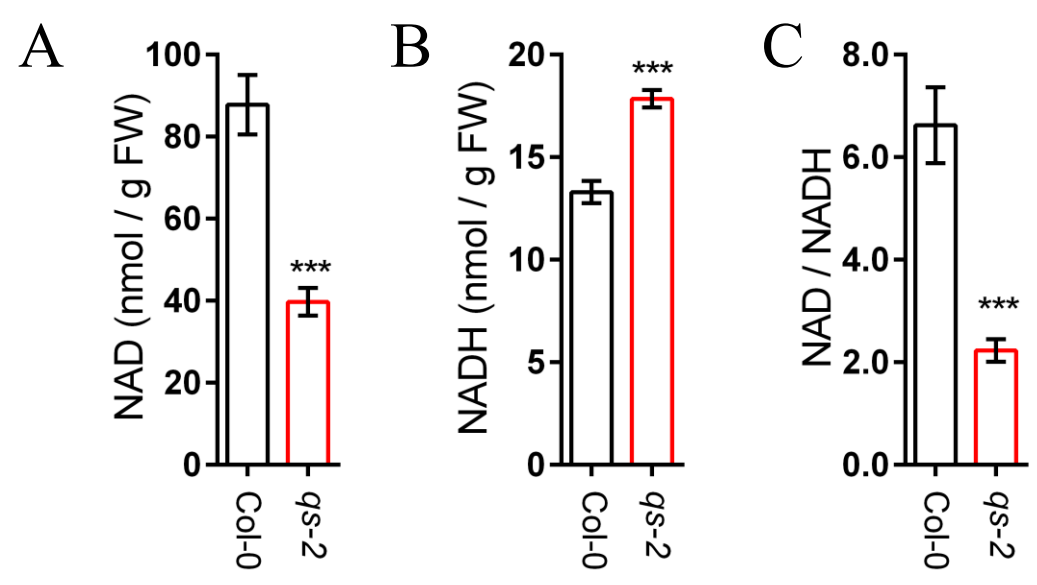

Supplement: pgen.1008892.s002.pdf [file pgen.1008892.s002.pdf]
