# Supplementary material for: Reciprocal regulation between nicotinamide adenine dinucleotide metabolism and abscisic acid and stress response pathways in Arabidopsis
Source: PubMed Central journal article supplement (PMC7332101; doi:10.1371/journal.pgen.1008892), 2020-06-22
Supplement: pgen.1008892.s006.pdf [file pgen.1008892.s006.pdf]

| Chr  | Site     | Ref | Alt | Region     | Gene      | Detail          | Type          | Total-depth | Ref-depth | Alt-depth |
|------|----------|-----|-----|------------|-----------|-----------------|---------------|-------------|-----------|-----------|
| Chr5 | 20359626 | -   | A   | upstream   | AT5G50050 | 43831           | -             | 22          | 0         | 22        |
| Chr5 | 20364893 | T   | -   | intronic   | AT5G50070 | 43831           | -             | 14          | 0         | 14        |
| Chr5 | 20364935 | -   | A   | intronic   | AT5G50070 | 43831           | -             | 11          | 0         | 11        |
| Chr5 | 20444003 | C   | G   | exonic     | AT5G50210 | c.C862G:p.Q288E | nonsynonymous | 31          | 0         | 31        |
| Chr5 | 20921186 | -   | A   | upstream   | AT5G51510 | 43831           | -             | 11          | 0         | 11        |
| Chr5 | 21023424 | -   | A   | downstream | AT5G51750 | 43831           | -             | 13          | 1         | 12        |
| Chr5 | 21046447 | T   | A   | intergenic | AT5G51795 | -               | -             | 14          | 0         | 14        |
| Chr5 | 21175547 | -   | C   | downstream | AT5G52120 | 43831           | -             | 41          | 0         | 41        |
| Chr5 | 21581896 | -   | T   | upstream   | AT5G53200 | 43831           | -             | 26          | 0         | 26        |
| Chr5 | 21672748 | -   | A   | upstream   | AT5G53420 | 43831           | -             | 7           | 0         | 7         |
