# Supplementary material for: Reciprocal regulation between nicotinamide adenine dinucleotide metabolism and abscisic acid and stress response pathways in Arabidopsis
Source: PubMed Central journal article supplement (PMC7332101; doi:10.1371/journal.pgen.1008892), 2020-06-22
Supplement: pgen.1008892.s007.pdf [file pgen.1008892.s007.pdf]

| <b>Forward Primer</b> | <b>Sequence</b>            | <b>Reverse Primer</b> | <b>Sequence</b>            | <b>Description</b>        |
|-----------------------|----------------------------|-----------------------|----------------------------|---------------------------|
| HIR2pg-FP             | CTCGAAATGCTGACTGGTAGA      | HIR2pg-RP             | GGAGGCATTGTTGGCCTGTAA      | HIR2pro:HIR2-3 × FLAG/Myc |
| hir2-1-LP             | GGGCAACTACTGATCTTTCCC      | hir2-1-RP             | CGAGCAGAAGAATGAAATTGC      | genotyping of hir2-1      |
| hir2-4-LP             | CGATTTTTCTCTCGCAAACAG      | hir2-4-RP             | TCAGCAACTCGATGTTTCAGTG     | genotyping of hir2-4      |
| QSpro-FP              | GGAGATCGATAAGGCTCTGAT      | QSpro-RP              | TCTCTTGCTCTCACAACTTAATA    | QSpro:QS-GUS              |
| QS-qFP                | AGGTTGGTGTGTACAGGATGT      | QS-qRP                | AGCAAACGCCTGCAGAATCG       | qRT-PCR                   |
| QS-pgFP               | GGAGATCGATAAGGCTCTGAT      | QS-pgRP               | TCTCTTGCTCTCACAACTTAATA    | QSpro:QS-3 × FLAG         |
| QSpG-FP               | GGAGATCGATAAGGCTCTGAT      | QSpG-RP               | TCTCTTGCTCTCACAACTTAATA    | QSpro:QS/qs-2-YFP         |
| RBOHF-qFP             | TCGGTTCGACTGCTTAAGGTTGC    | RBOHF-qRP             | ATGGCGAAACCGCAGGACATTG     | qRT-PCR                   |
| ACT2-qFP              | CGTACAACCGGTATTGTGCT       | ACT2-qRP              | GATGTCTCTTACAATTTCCCGCT    | qRT-PCR                   |
| UBQ5-qFP              | AG AAG ATC AAG CAC AAG CAT | UBQ5-qRP              | CA GAT CAA GCT TCA ACT CCT | qRT-PCR                   |
| snrk2.2-LP            | TCCTCTGGGATCGAGTATGTG      | snrk2.2-RP            | TGGTTTAGGTGATTTTGACGC      | genotyping of snrk2.2     |
| LBo8409               | ATATTGACCATCATACTCATTGC    |                       |                            | genotyping of snrk2.2     |
| snrk2.3-LP            | TGCTTTTGAGTGCTTTTAATGTG    | snrk2.3-RP            | ACATCTGCAATCTGGTAACCG      | genotyping of snrk2.3     |
| snrk2.6-LP            | CATATCTTTAGACGAGGGGCC      | snrk2.6-RP            | GTGAGTGGTCCAATGGATTTG      | genotyping of snrk2.6     |
| rbohF3-LP             | CGATCTTCAAGACGATGACAC      | rbohF3-RP             | GAAGATCTGGAGACGAGAATC      | genotyping of rbohF3      |
| dSpm1n                | AGTAAGAGTGTGGGGTTTTGG      |                       |                            | genotyping of rbohF3      |
| qs-2-seqLP            | GGAAGCTTTGCTCAAGCTCAG      | qs-2-seqRP            | TCTCATCTGACATCCTGTACAC     | genotyping of qs-2        |
| ABI4-gFP              | ATGGACCCTTTAGCTTCCCAA      | ABI4-gRP              | ATAGAATTCCCCCAAGATGGG      | 35S:ABI4:3 × FLAG         |
| ABI4-MBP-FP           | ATGGACCCTTTAGCTTCCCAA      | ABI4-MBP-FP           | ATAGAATTCCCCCAAGATGGG      | MBP-ABI4                  |
| QS-p1-FP              | TGCAGTTGACGCAAATGGCAT      | QS-p1-RP              | TCAGAGCCTTATCGATCTCC       | ChIP and EMSA assay       |
| QS-p2-FP              | TACCAAGAACTCGAATATCCCA     | QS-p2-RP              | TCGCTACAATATTGTGACATCG     | ChIP and EMSA assay       |
| QS-p3-FP              | CAAAGCAAAGTGGAACACTTGC     | QS-p3-RP              | AGAAGGGTTAGGGGTCCGAG       | ChIP and EMSA assay       |
